# Supplementary material for: Chemical Profiles of Incense Smoke Ingredients from Agarwood by Headspace Gas Chromatography-Tandem Mass Spectrometry
Source: MDPI journal article supplement (doi:10.3390/molecules23112969), 2018-11-14
Supplement: s1 [file s1]

# **Chemical Profiles of Incense Smoke Ingredients from Agarwood by Headspace Gas Chromatography - Tandem Mass Spectrometry**

Wen-Yi Kao, Chien-Yun Hsiang, Shih-Ching Ho, Tin-Yun Ho, and Kung-Ta Lee

## Supplementary materials

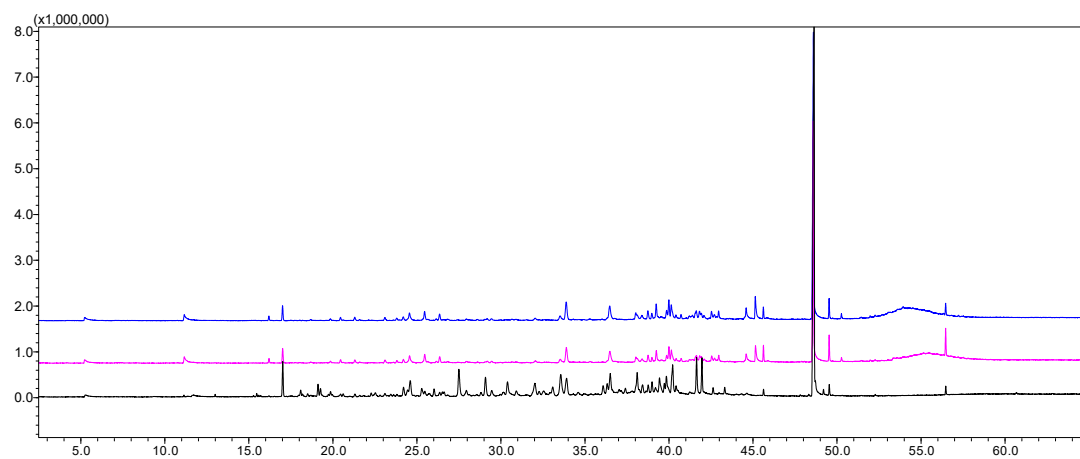

**Figure S1.** GC chemical fingerprint of incense smoke from Kynam agarwood. GC analysis was performed in triplicate.

(A)

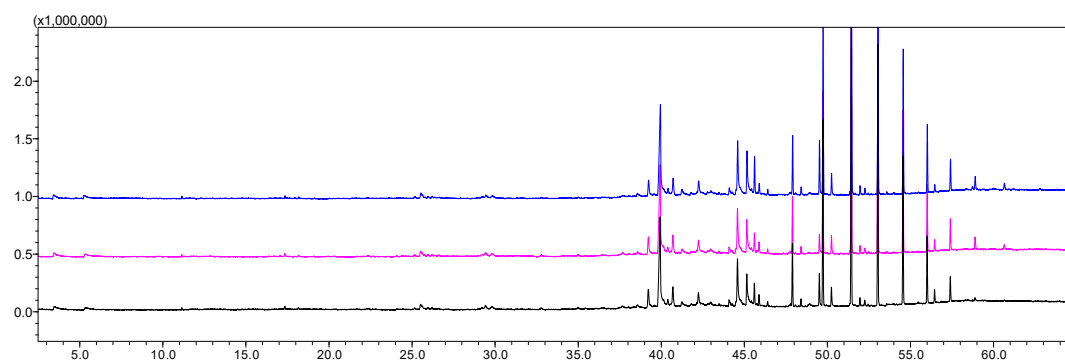

(B)

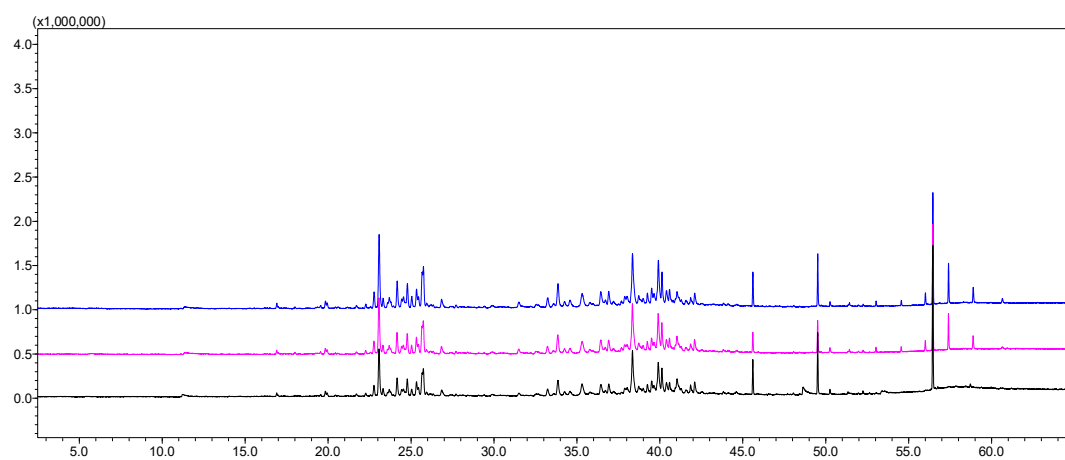

(C)

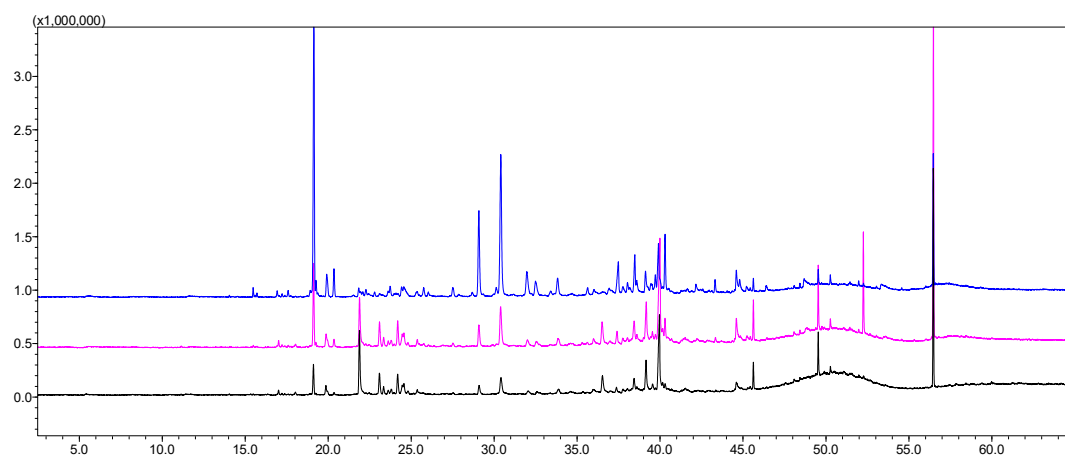

**Figure S2.** GC chemical fingerprint of incense smoke from Vietnam (A), Liao (B), and Cambodia agarwoods (C). GC analysis was performed in triplicate.

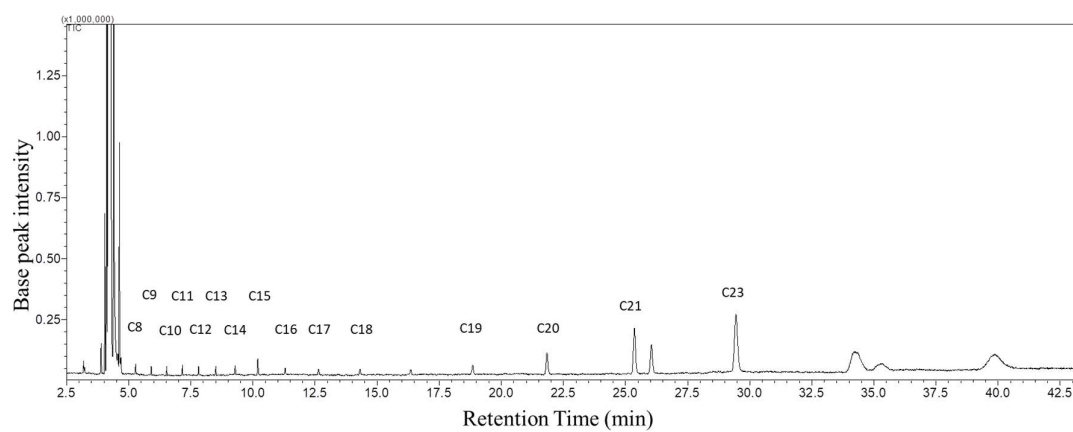

**Figure S3.** GC chromatogram of n-alkanes calibration standard (C8-C40).
